# Supplementary material for: Comprehensive Profiling of Amino Acid Response Uncovers Unique Methionine-Deprived Response Dependent on Intact Creatine Biosynthesis
Source: PubMed Central journal article supplement (PMC4388453; doi:10.1371/journal.pgen.1005158), 2015-04-07

Fig S2

A.

**Criteria for the specific gene response:**

$\Delta\text{Log}_2(\$i) \geq 0.8$ ;  $\Delta\text{Log}_2(\$j) < 0.5$ , if the level of a probe is induced;  
 $\Delta\text{Log}_2(\$i) \leq -0.8$ ;  $\Delta\text{Log}_2(\$j) > -0.5$ , if the level of a probe is repressed;  
 $\$i$  : The probe level of a targeted amino acid deprivation;  
 $\$j$  : The probe level of any other amino acid deprivation.

| Treatment | Specificity |     |      |
|-----------|-------------|-----|------|
|           | All         | Up  | Down |
| +AAs      | 0           | 0   | 0    |
| -Gln      | 3           | 1   | 2    |
| -His      | 2           | 1   | 1    |
| -Ile      | 12          | 2   | 10   |
| -Leu      | 0           | 0   | 0    |
| -Val      | 3           | 0   | 3    |
| -Phe      | 14          | 1   | 13   |
| -Gly      | 0           | 0   | 0    |
| -Arg      | 24          | 9   | 15   |
| -Cys      | 2           | 1   | 1    |
| -Lys      | 39          | 13  | 26   |
| -Met      | 906         | 568 | 338  |
| -Ser      | 10          | 10  | 0    |
| -Thr      | 21          | 12  | 9    |
| -Tyr      | 6           | 2   | 4    |
| -Trp      | 19          | 4   | 15   |

B.

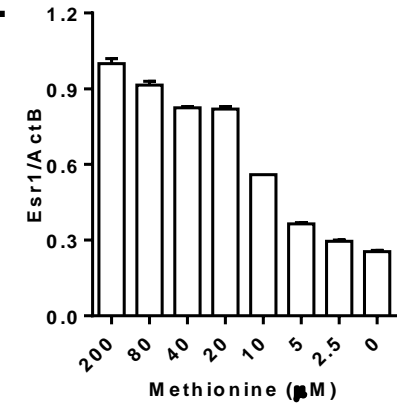

C.

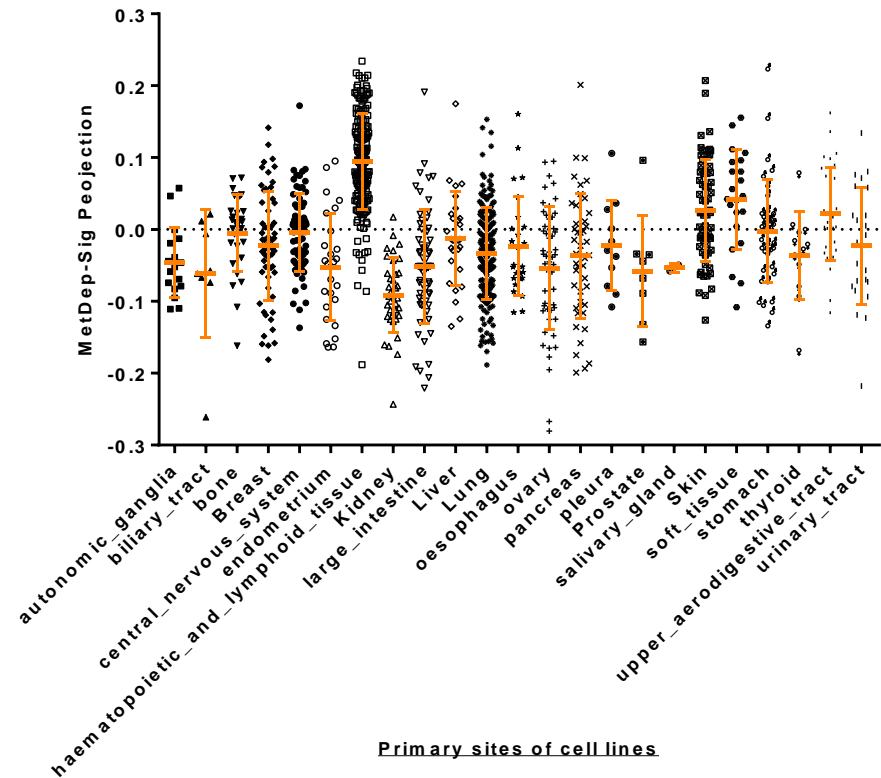

Supplement: pgen.1005158.s002.pdf [file pgen.1005158.s002.pdf]
