# Supplementary material for: Comprehensive Profiling of Amino Acid Response Uncovers Unique Methionine-Deprived Response Dependent on Intact Creatine Biosynthesis
Source: PubMed Central journal article supplement (PMC4388453; doi:10.1371/journal.pgen.1005158), 2015-04-07

**Fig S3**

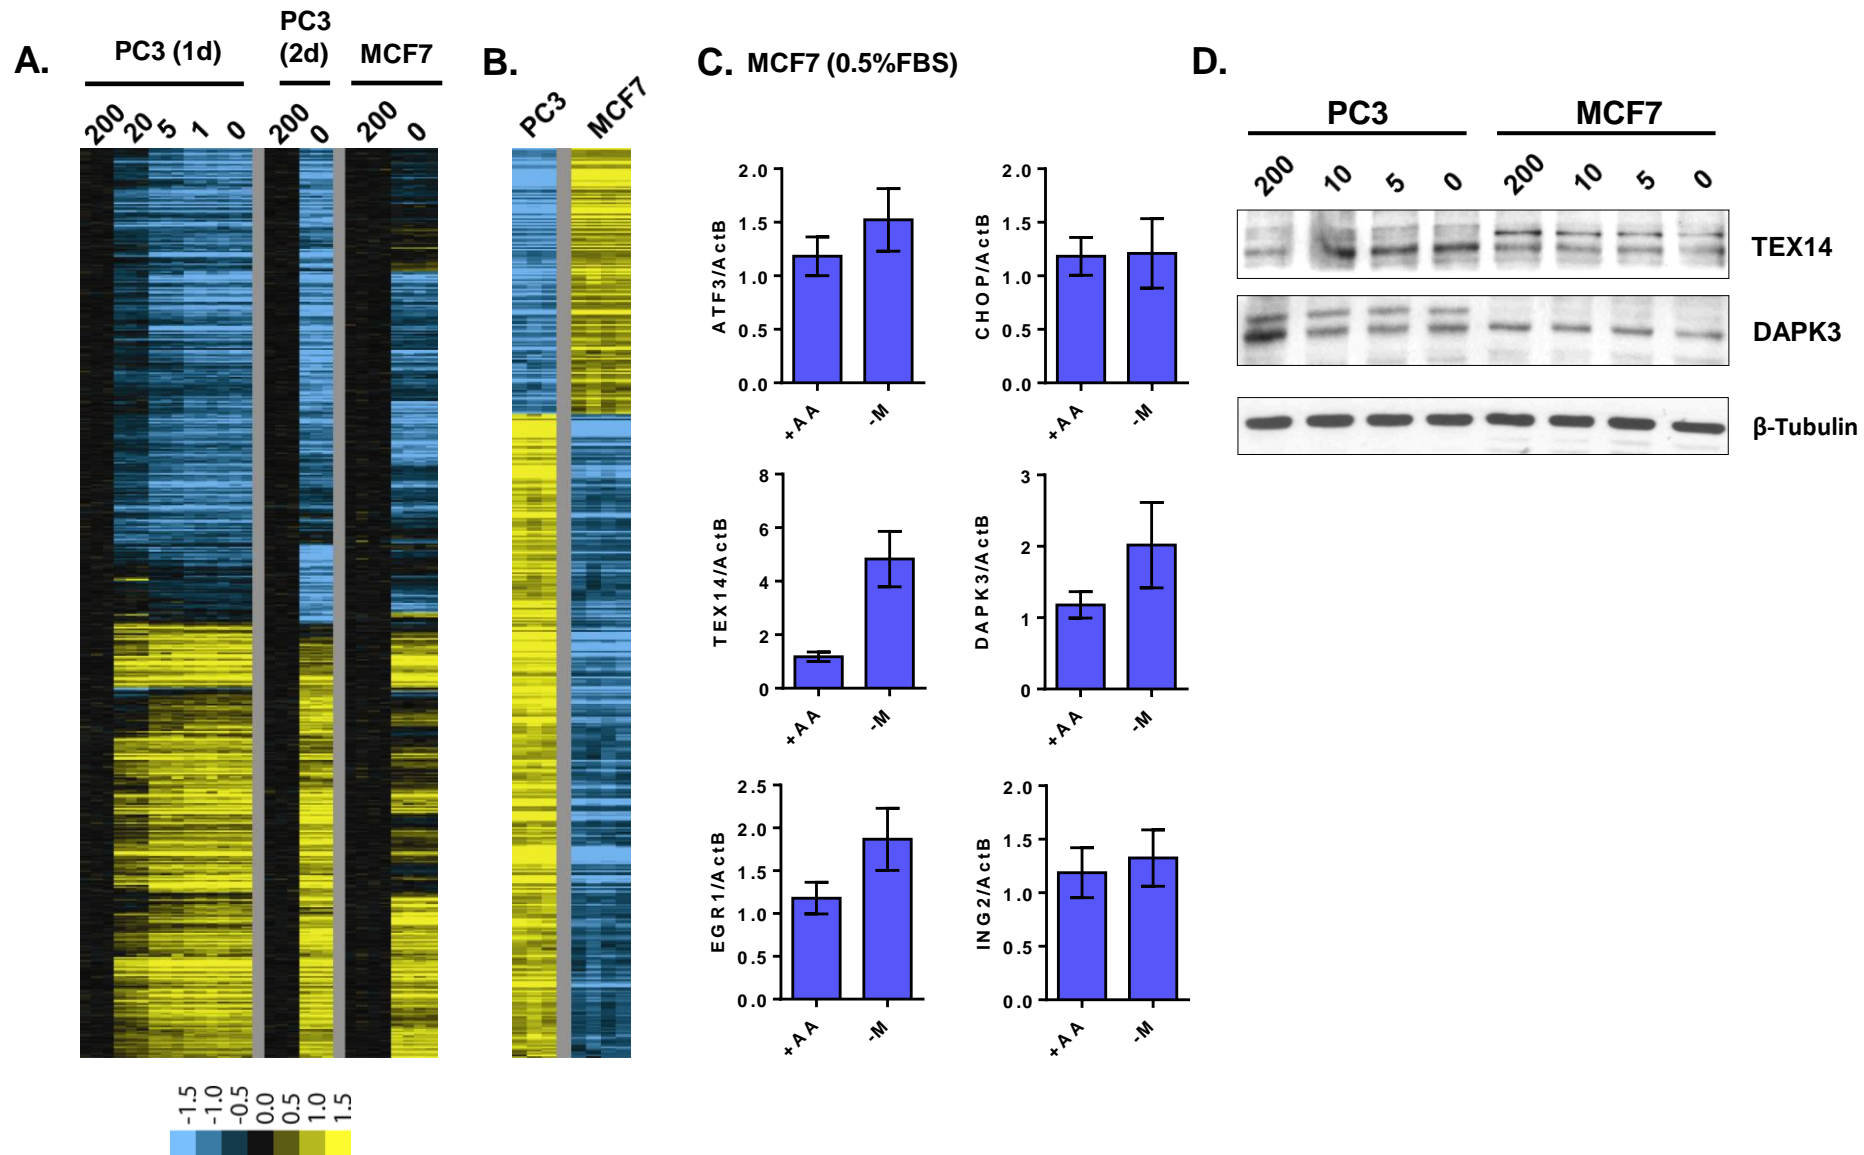

Supplement: pgen.1005158.s003.pdf [file pgen.1005158.s003.pdf]
