# Supplementary material for: Comprehensive Profiling of Amino Acid Response Uncovers Unique Methionine-Deprived Response Dependent on Intact Creatine Biosynthesis
Source: PubMed Central journal article supplement (PMC4388453; doi:10.1371/journal.pgen.1005158), 2015-04-07
Supplement: pgen.1005158.s004.pdf [file pgen.1005158.s004.pdf]

**Fig S4**

**A.**

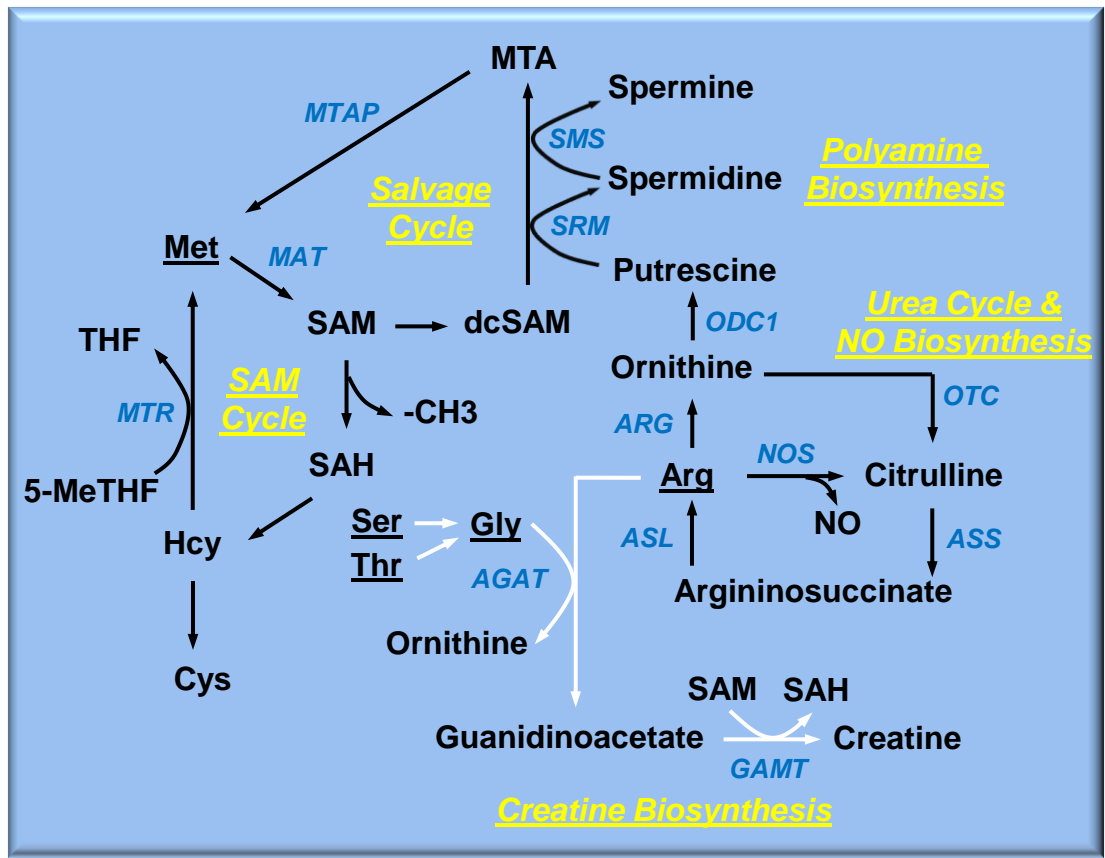

**B.**

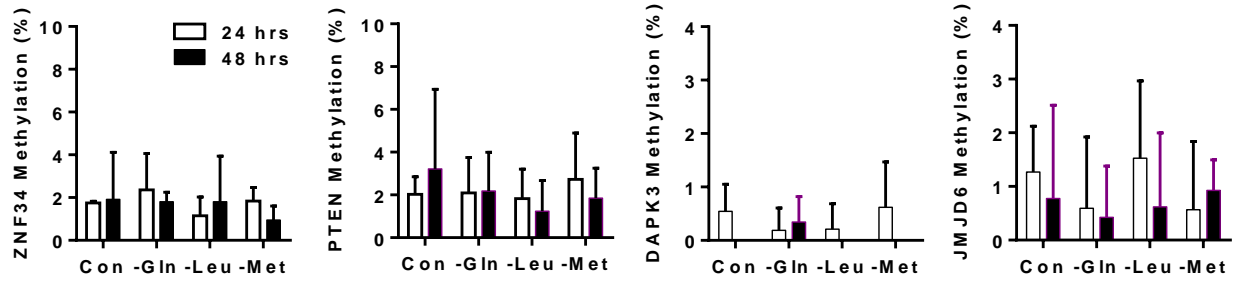

**C.**

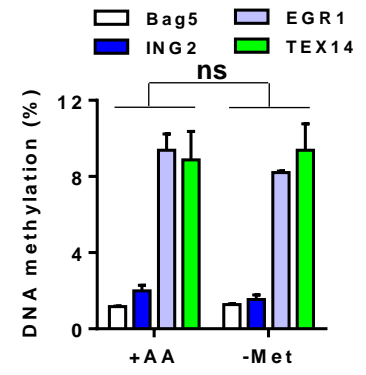

**D.**

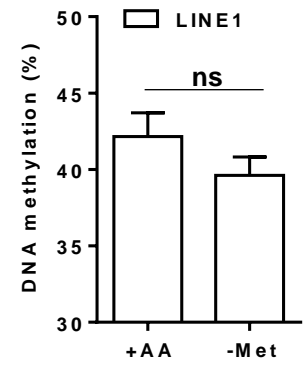

Fig S4 cont'

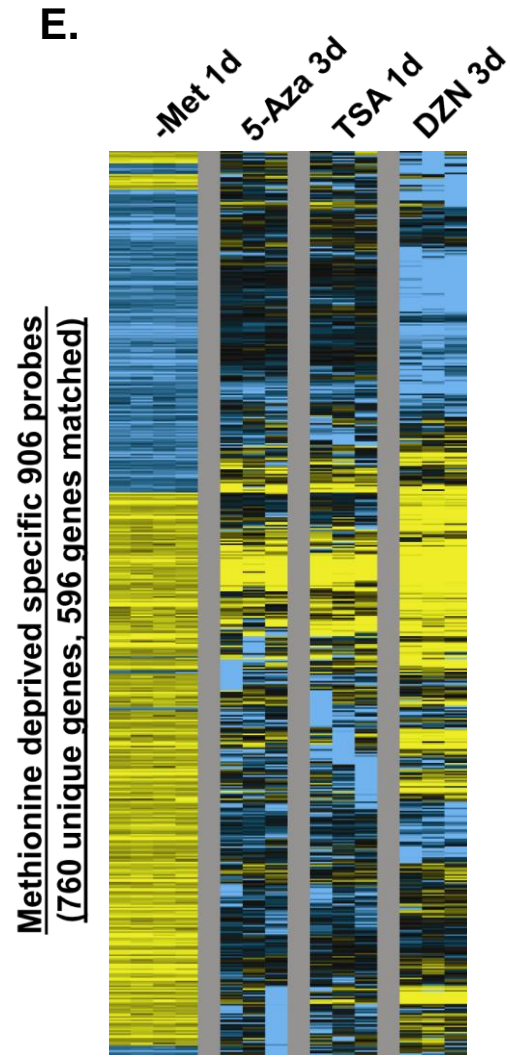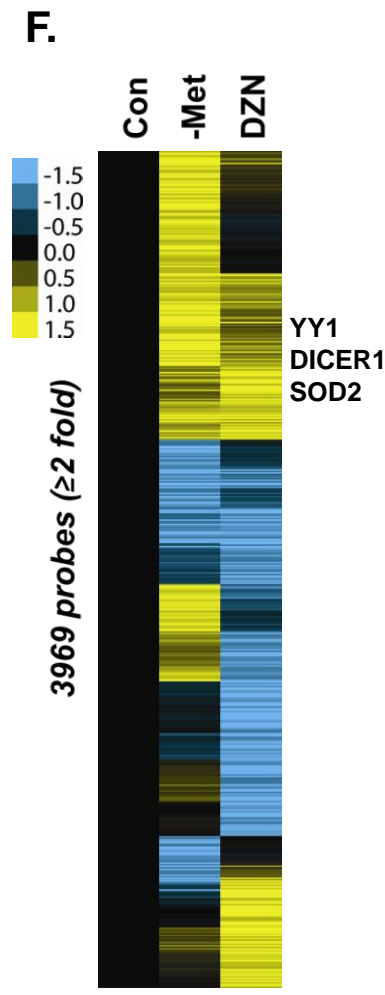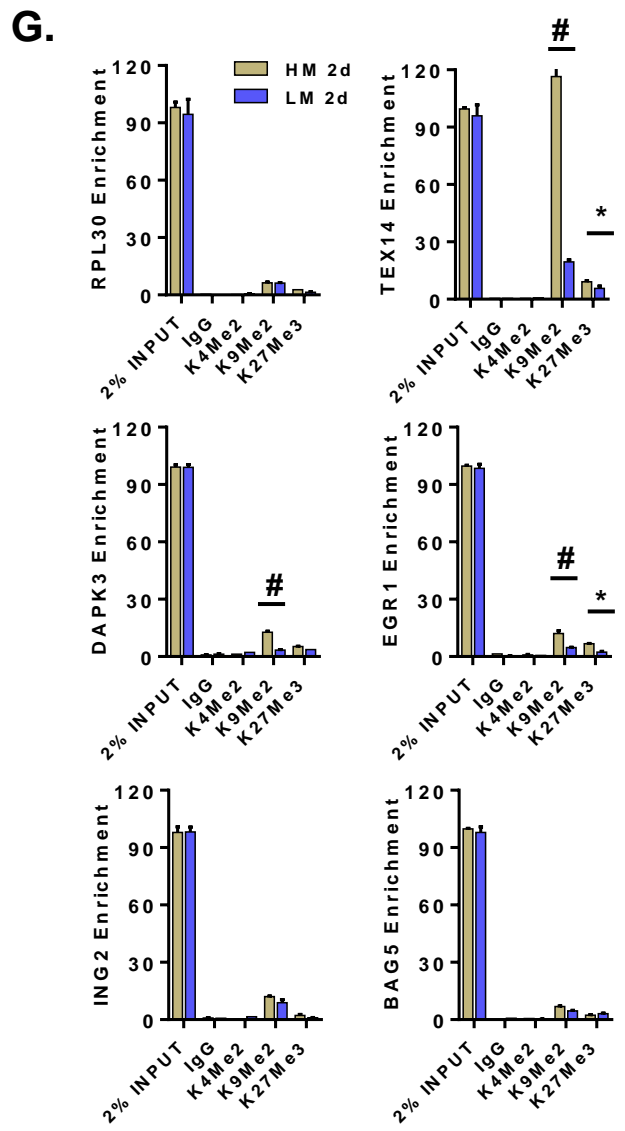

Sun F et al, Mol Cancer Ther.  
2009 Dec;8(12):3191-202.
