# Supplementary material for: Comprehensive Profiling of Amino Acid Response Uncovers Unique Methionine-Deprived Response Dependent on Intact Creatine Biosynthesis
Source: PubMed Central journal article supplement (PMC4388453; doi:10.1371/journal.pgen.1005158), 2015-04-07

**Fig S6**

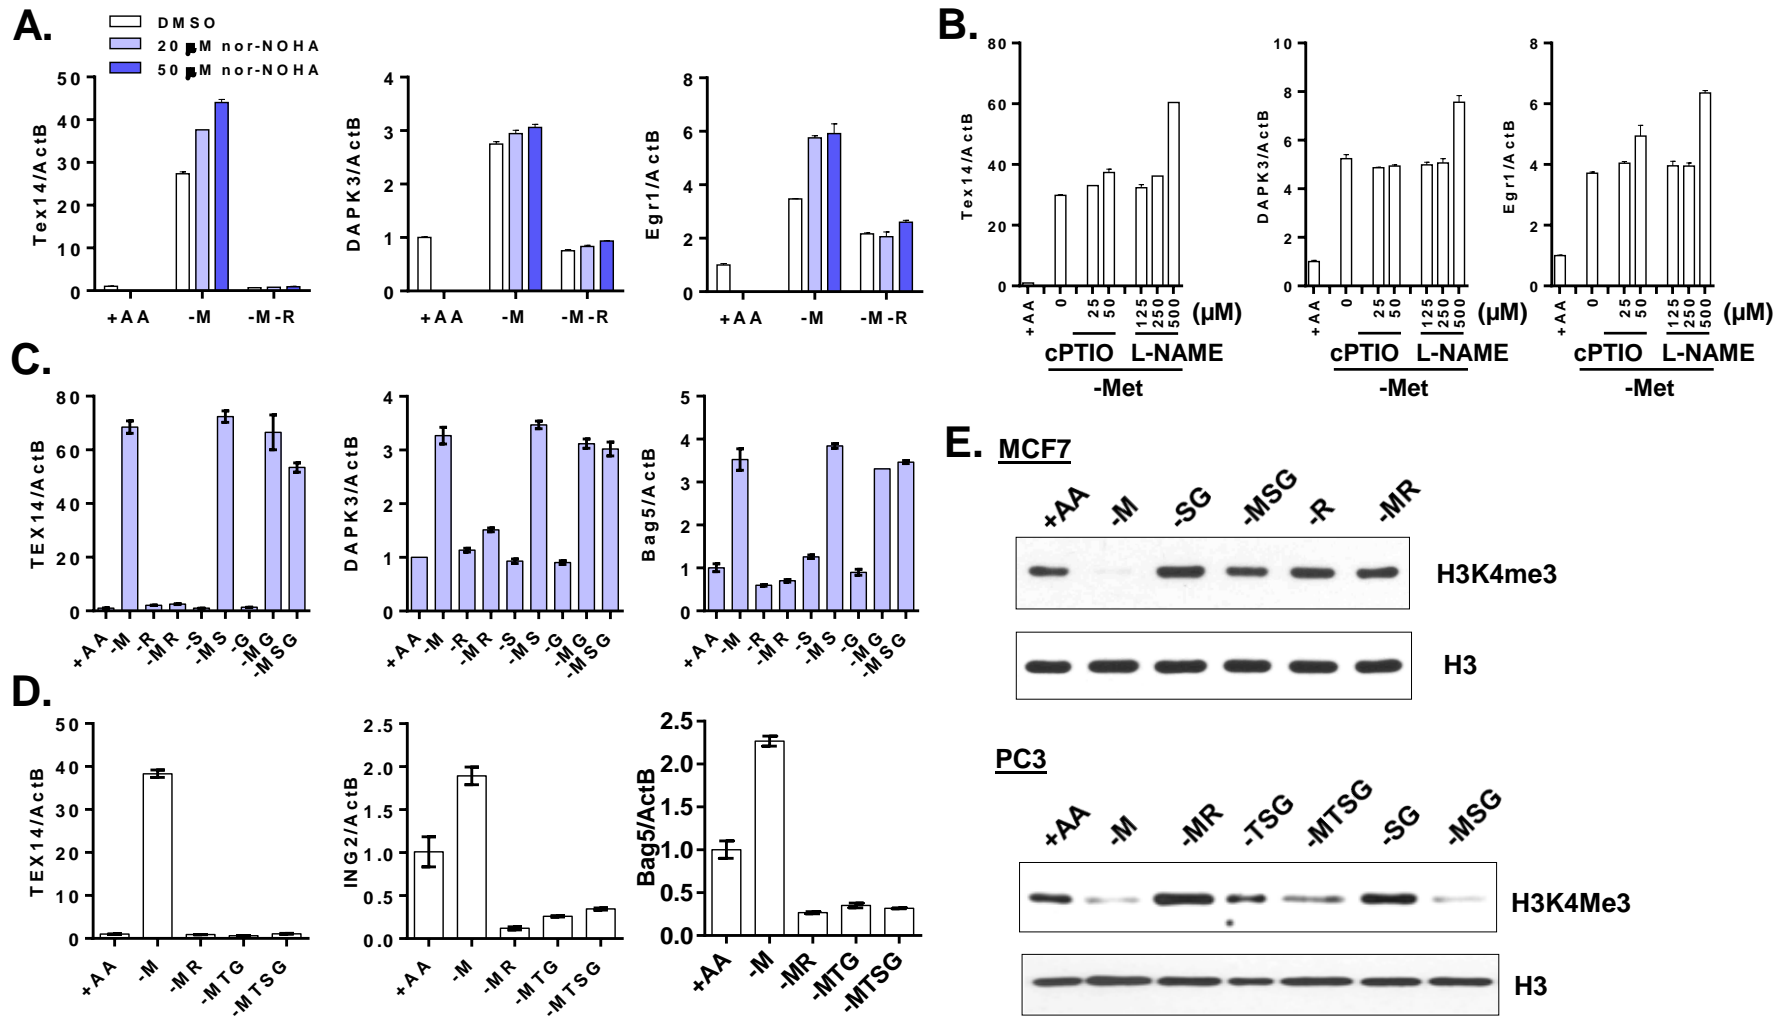

Fig S6 cont'

F.

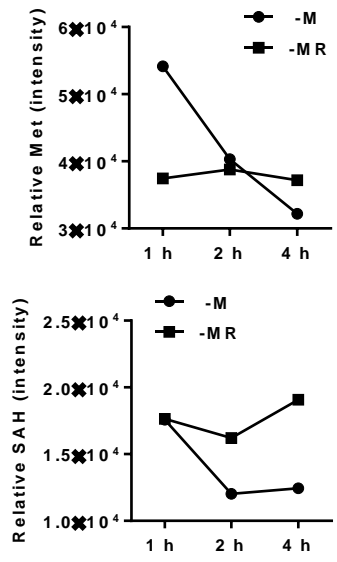

G.

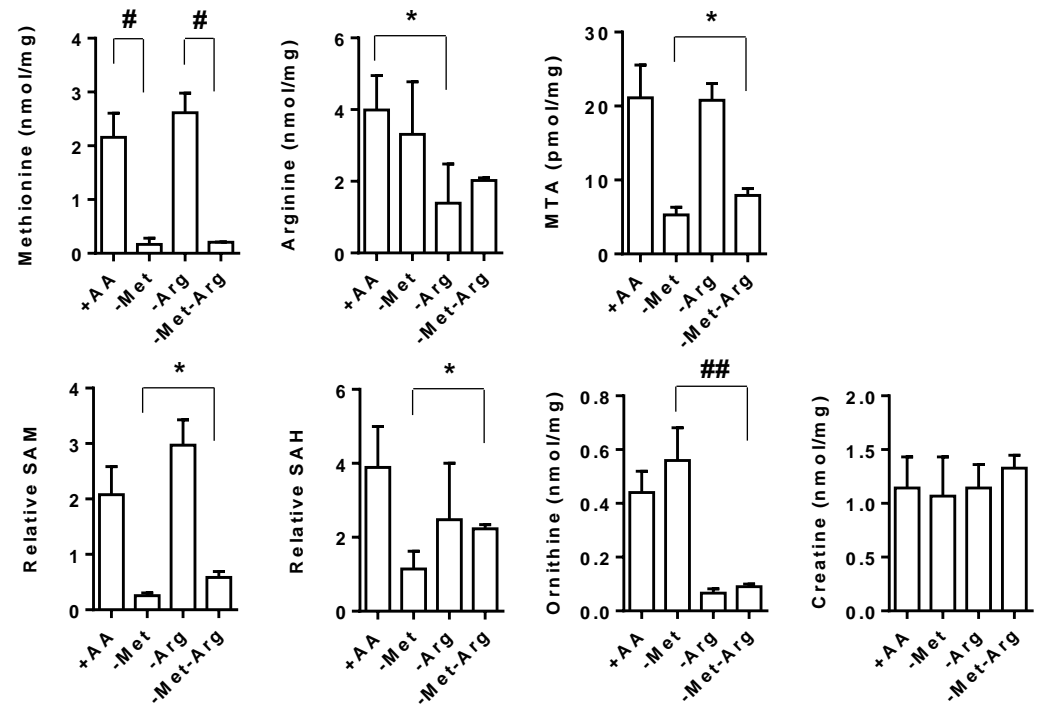

H.

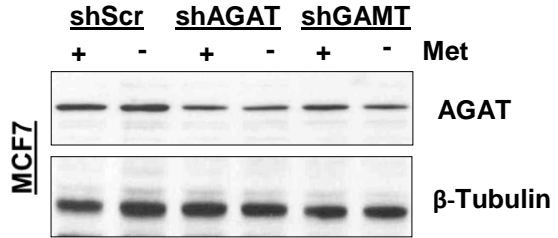

Supplement: pgen.1005158.s006.pdf [file pgen.1005158.s006.pdf]
