# Supplementary material for: Comprehensive Profiling of Amino Acid Response Uncovers Unique Methionine-Deprived Response Dependent on Intact Creatine Biosynthesis
Source: PubMed Central journal article supplement (PMC4388453; doi:10.1371/journal.pgen.1005158), 2015-04-07

**Fig S7.**

**A. Orn: 0.4 mM ornithine**

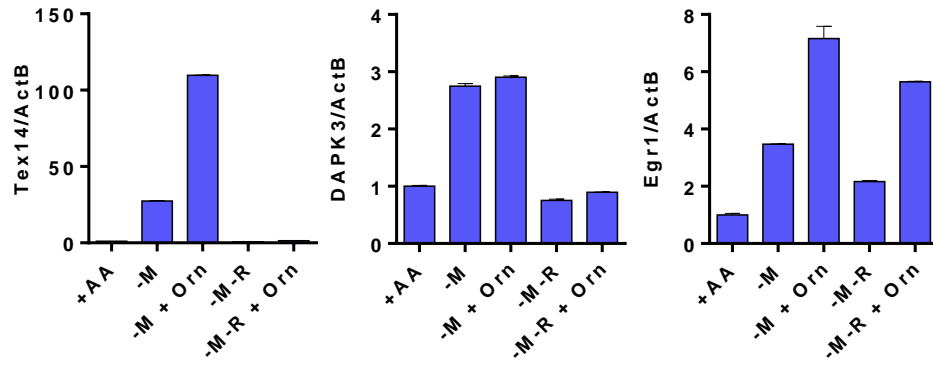

**B. Cr: 0.4 mM Creatine**

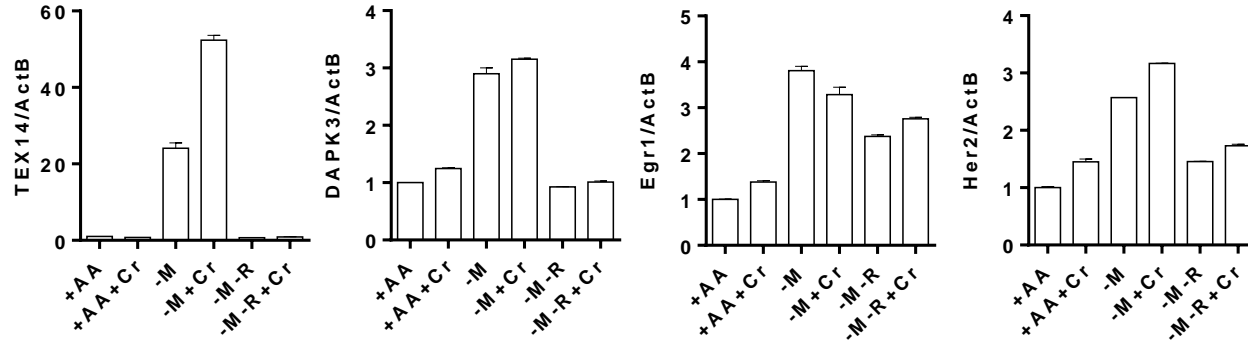

Supplement: pgen.1005158.s007.pdf [file pgen.1005158.s007.pdf]
