# Supplementary material for: Comprehensive Profiling of Amino Acid Response Uncovers Unique Methionine-Deprived Response Dependent on Intact Creatine Biosynthesis
Source: PLoS Genet. 2015 Apr 7;11(4):e1005158. doi: 10.1371/journal.pgen.1005158 (PMC4388453; doi:10.1371/journal.pgen.1005158)
Supplement: S5 Table — (XLSX) [file pgen.1005158.s013.xlsx]

## Sheet: Sheet1
Primer_Name	Primer_Sequences
For qPCR:
Actb-For	CACTCTTCCAGCCTTCCTTC
Actb-Rev	GGATGTCCACGTCACACTTC
CHOP-For	CATCACCACACCTGAAAGCA
CHOP-Rev	GACAGTGTCCCGAAGGAGAA
ATF3-For	GAGCTCAAGAACGAGAAGCA
ATF3-Rev	TTCTGAGCCCGGACAATACAC
TXNIP-For	CTGGCGTAAGCTTTTCAAGG
TXNIP-Rev	AGTGCACAAAGGGGAAACAC
Waf1-For	GGCAGACCAGCATGACAGATT
Waf1-Rev	GCGGATTAGGGCTTCCTCTT
Mdm2-For	AAGCCTGGCTCTGTGTGTAA
Mdm2-Rev	TACACCAGCATCAAGATCCG
TEX14-For	ATGGCAAGTTTGACAAGACG
TEX14-Rev	GGAGATGGGTGCCTGATACT
DAPK3-For	ACCCAGTTCCTCAAGCAGAT
DAPK3-Rev	GTCGATGAGCTTGATTCGTG
ING2-For	CCCACGACATGCAGAGGAA
ING2-Rev	CTGGAGAAGCTGCTGTAGAC
BAG5-For	CGTGCATTAGGCCATTGTGG
BAG5-Rev	AGCCGATAACTTGCTGTTCTACA
EGR1-For	TTT GCC AGG AGC GAT GAA C
EGR1-Rev	CCG AAG AGG CCA CAA CAC TT
ESR1-For	CCGCAAATGCTACGAAGTGG
ESR1-Rev	AGGTTGGCAGCTCTCATGTC
SRM-For	CTCATGAAGACAGCCCTCAA
SRM-resal-Rev	CTCCTTGATGAGGTCCAGGT
AGAT-For	AAGCCCACAATGGCTGATGA
AGAT-Rev	CAGCATCAAAGCATGGCTCA
GAMT-For	GGGAGACCCCCTATATGCAC
GAMT-Rev	CGTCATTGCACTCGATGATCC
For CHIP-qPCR
TEX14-CHIP-For	GGAGGAAGGCAAGCAGTTTA
TEX14-CHIP-Rev	TCGCCAATAGGTAGGGAATAA
DAPK3-CHIP-For	GGTGACATGACAGGACCCAG
DAPK3-CHIP-Rev	CTGTCCAGCAAACACAAGCC
EGR1-CHIP-For	GCCCTGGATGACAGCGATAG
EGR1-CHIP-Rev	TCCTAGGCGTGAACTAGGCT
ING2-CHIP-For	GATTCCAGCGTAGGGGAAGG
ING2-CHIP-Rev	GCTTGATCAGGGAGGTAGGC
BAG5-CHIP-For	GGTTTGTCTTCCCTTCCGGT
BAG5-CHIP-Rev	GGCTGTCAACTCGCTCCG
RPL30 Exon 3 Primers	Cell Signaling #7014
For pyro-Sequencing
BAG5-For	TGGGTAAAGGGTTAAGAGGGA
BAG5-Rev	CCCCAACATACTCCACTCTCT
BAG5-Sequencing	TGGATTTTTAGTGGGA
EGR1-For	GAGTATTTGATAGTAGGTAAGTAGTGGTTT
EGR1-Rev	TTCCTTAACATCCCTCTAACACAT
EGR1-Sequencing	TGATAGTAGGTAAGTAGTGGTT
ING2-For	TGGGTTGGTTGATTGGGTAAT
ING2-Rev	AACCCAACACATTTCCCCTTTT
ING2-Sequencing	GATTTTAAGTGTGGAG
TEX14-For	GGAAGTGGGAGGAAGTAGAATTTA
TEX14-Rev	AAATTTCCCCCTATCTCCAAC
TEX14-Sequencing	GGAGATTGGGTTGAA
LINE1-For	TTTTGAGTTAGGTGTGGGATATAGT
LINE1-Rev	AAAATCAAAAAATTCCCTTTC
LINE1-Sequencing	GAGTTAGGTGTGGGATATAGT
ZNF34	Qiagen assay design
PTEN	Qiagen assay design
DAPK3	Qiagen assay design
JMJD6	Qiagen assay design
